# Supplementary material
Source: Research Square preprint supplement (doi:10.21203/rs.3.rs-9697991/v1)
Supplement: Supplementary file 1 [file 78bb30e06d1fd3b1224669e9.docx]

Supplementary Table 1. Differential analysis of gut microbiota between two species.

| **Comparison**  **Name** | **Feature** | **Enriched**  **Group** | **LDA**  **Score** | **Log2FC** | **KW**  **Pvalue** | **WilcoxPvalue** | **Mean**  **Abundance** |
| --- | --- | --- | --- | --- | --- | --- | --- |
| Em0d_vs_AC0d | *Escherichia* | AC0d | 6.4287 | -19.6428 | 0.0021 | 0.0028 | 0.4093 |
| Em0d_vs_AC0d | *Lactobacillus* | AC0d | 5.5006 | -7.7431 | 0.0028 | 0.0037 | 0.0040 |
| Em0d_vs_AC0d | *Streptococcus* | AC0d | 5.1348 | -5.1787 | 0.0027 | 0.0035 | 0.0007 |
| Em0d_vs_AC0d | *Facklamia* | AC0d | 3.7124 | -4.0764 | 0.0030 | 0.0039 | 0.0007 |
| Em0d_vs_AC0d | *Ruminococcus* | AC0d | 2.5384 | -3.0891 | 0.0036 | 0.0047 | 0.0010 |
| Em0d_vs_AC0d | *Jeotgalicoccus* | AC0d | 2.4480 | -9.8859 | 0.0021 | 0.0027 | 0.0005 |
| Em0d_vs_AC0d | *Sporobacter* | Em0d | 2.4036 | 14.2208 | 0.0021 | 0.0028 | 0.0095 |
| Em0d_vs_AC0d | *Clostridium* | AC0d | 2.2972 | -3.8777 | 0.0027 | 0.0035 | 0.0003 |
| Em0d_vs_AC0d | *Corynebacterium* | AC0d | 2.2178 | -8.6469 | 0.0071 | 0.0093 | 0.0002 |
| Em0d_vs_AC0d | *AF12* | Em0d | 2.1144 | 9.8218 | 0.0021 | 0.0028 | 0.0005 |
| Em0d_vs_AC0d | *Ewingella* | Em0d | 2.1108 | 18.9293 | 0.0021 | 0.0028 | 0.2496 |
| Em0d_vs_AC0d | *Anaerofilum* | Em0d | 2.0356 | 13.5559 | 0.0021 | 0.0028 | 0.0060 |
| Em7d_vs_AC7d | Barnesiellaceae(UG) | Em7d | 7.1963 | 8.4464 | 0.0038 | 0.0049 | 0.1210 |
| Em7d_vs_AC7d | *Papillibacter* | Em7d | 6.4101 | 14.1877 | 0.0021 | 0.0028 | 0.0093 |
| Em7d_vs_AC7d | *Staphylococcus* | AC7d | 5.9161 | -9.5781 | 0.0017 | 0.0023 | 0.0004 |
| Em7d_vs_AC7d | *Defluviitalea* | Em7d | 5.8329 | 13.3860 | 0.0021 | 0.0028 | 0.0054 |
| Em7d_vs_AC7d | *Ewingella* | Em7d | 5.0107 | 18.1540 | 0.0021 | 0.0028 | 0.1458 |
| Em7d_vs_AC7d | Pseudomonadaceae(UG) | Em7d | 4.7194 | 9.5706 | 0.0020 | 0.0027 | 0.0004 |
| Em7d_vs_AC7d | *Sporobacter* | Em7d | 4.5057 | 16.3625 | 0.0021 | 0.0028 | 0.0421 |
| Em7d_vs_AC7d | Christensenellaceae(UG) | Em7d | 4.3367 | 16.5107 | 0.0021 | 0.0028 | 0.0467 |
| Em7d_vs_AC7d | *Anaerofilum* | Em7d | 4.0886 | 6.6969 | 0.0036 | 0.0047 | 0.0077 |
| Em7d_vs_AC7d | *Persicirhabdus* | Em7d | 3.8308 | 9.4264 | 0.0020 | 0.0027 | 0.0003 |
| Em7d_vs_AC7d | *Anaerovorax* | Em7d | 3.6515 | 8.1813 | 0.0017 | 0.0022 | 0.0001 |
| Em7d_vs_AC7d | *AF12* | Em7d | 3.2461 | 11.1312 | 0.0021 | 0.0027 | 0.0011 |
| Em7d_vs_AC7d | *Arcobacter* | Em7d | 3.1648 | 10.8210 | 0.0021 | 0.0027 | 0.0009 |
| Em7d_vs_AC7d | *Dehalobacterium* | Em7d | 3.1307 | 6.1238 | 0.0028 | 0.0036 | 0.0013 |
| Em7d_vs_AC7d | *Facklamia* | AC7d | 3.1301 | -3.7263 | 0.0034 | 0.0044 | 0.0010 |
| Em7d_vs_AC7d | *Turicibacter* | AC7d | 3.0427 | -11.1387 | 0.0020 | 0.0027 | 0.0011 |
| Em7d_vs_AC7d | *Jeotgalicoccus* | AC7d | 2.8585 | -10.9660 | 0.0021 | 0.0027 | 0.0010 |
| Em7d_vs_AC7d | *Allobaculum* | AC7d | 2.8572 | -12.2927 | 0.0021 | 0.0027 | 0.0025 |
| Em7d_vs_AC7d | ML615J-28(UG) | Em7d | 2.8135 | 11.7160 | 0.0021 | 0.0028 | 0.0017 |
| Em7d_vs_AC7d | *Aerococcus* | AC7d | 2.7674 | -10.2295 | 0.0019 | 0.0026 | 0.0006 |
| Em7d_vs_AC7d | *Anaerostipes* | Em7d | 2.5889 | 9.8797 | 0.0033 | 0.0043 | 0.0348 |
| Em7d_vs_AC7d | *Parabacteroides* | AC7d | 2.4099 | -10.8851 | 0.0021 | 0.0028 | 0.0009 |
| Em7d_vs_AC7d | Muribaculaceae(UG) | AC7d | 2.3686 | -10.4144 | 0.0036 | 0.0047 | 0.0995 |
| Em7d_vs_AC7d | *Lactobacillus* | AC7d | 2.3003 | -18.2619 | 0.0021 | 0.0028 | 0.1572 |
| Em7d_vs_AC7d | Bacteroidales(UG) | Em7d | 2.2160 | 1.7732 | 0.0038 | 0.0049 | 0.0039 |
| Em7d_vs_AC7d | *Bifidobacterium* | AC7d | 2.1918 | -7.9969 | 0.0068 | 0.0089 | 0.0001 |
| Em7d_vs_AC7d | *Flexispira* | AC7d | 2.1918 | -7.9969 | 0.0068 | 0.0089 | 0.0001 |
| Em7d_vs_AC7d | mb2424(UG) | Em7d | 2.1918 | 8.9866 | 0.0068 | 0.0089 | 0.0003 |
| Em7d_vs_AC7d | Rhizobiales(UG) | Em7d | 2.1918 | 7.9894 | 0.0068 | 0.0089 | 0.0001 |
| Em7d_vs_AC7d | Clostridiales(UG) | AC7d | 2.1589 | -4.5651 | 0.0103 | 0.0129 | 0.0491 |
| Em7d_vs_AC7d | YS2(UG) | AC7d | 2.1517 | -9.0934 | 0.0071 | 0.0093 | 0.0003 |
| Em7d_vs_AC7d | *Adlercreutzia* | AC7d | 2.0211 | -2.5842 | 0.0055 | 0.0071 | 0.0005 |
| Em7d_vs_AC7d | *Corynebacterium* | AC7d | 2.0000 | -8.7722 | 0.0073 | 0.0095 | 0.0002 |
| Em14d_vs_AC14d | *Ruminococcus* | AC14d | 9.1172 | -5.7198 | 0.0036 | 0.0047 | 0.0059 |
| Em14d_vs_AC14d | Barnesiellaceae(UG) | Em14d | 8.1533 | 8.7281 | 0.0039 | 0.0050 | 0.1238 |
| Em14d_vs_AC14d | *Anaerofilum* | Em14d | 6.3365 | 8.6745 | 0.0028 | 0.0037 | 0.0076 |
| Em14d_vs_AC14d | *Ewingella* | Em14d | 5.1857 | 18.1626 | 0.0021 | 0.0028 | 0.1467 |
| Em14d_vs_AC14d | *Streptococcus* | AC14d | 3.9229 | -2.8665 | 0.0036 | 0.0047 | 0.0023 |
| Em14d_vs_AC14d | *Escherichia* | AC14d | 3.6068 | -12.3470 | 0.0028 | 0.0037 | 0.0968 |
| Em14d_vs_AC14d | Muribaculaceae(UG) | AC14d | 3.5491 | -11.1098 | 0.0035 | 0.0045 | 0.1210 |
| Em14d_vs_AC14d | *Lactobacillus* | AC14d | 3.5347 | -17.5818 | 0.0021 | 0.0028 | 0.0981 |
| Em14d_vs_AC14d | *Adlercreutzia* | AC14d | 3.2327 | -2.4588 | 0.0030 | 0.0039 | 0.0005 |
| Em14d_vs_AC14d | ML615J-28(UG) | Em14d | 3.2139 | 11.4248 | 0.0021 | 0.0028 | 0.0014 |
| Em14d_vs_AC14d | *Corynebacterium* | AC14d | 3.1951 | -8.9941 | 0.0019 | 0.0026 | 0.0003 |
| Em14d_vs_AC14d | *Facklamia* | AC14d | 2.9992 | -4.7674 | 0.0033 | 0.0043 | 0.0015 |
| Em14d_vs_AC14d | *Dehalobacterium* | Em14d | 2.9319 | 6.1633 | 0.0028 | 0.0036 | 0.0014 |
| Em14d_vs_AC14d | YS2(UG) | AC14d | 2.8868 | -9.0934 | 0.0019 | 0.0025 | 0.0003 |
| Em14d_vs_AC14d | *Papillibacter* | Em14d | 2.8864 | 14.4779 | 0.0021 | 0.0028 | 0.0114 |
| Em14d_vs_AC14d | *Sporobacter* | Em14d | 2.8052 | 11.1640 | 0.0028 | 0.0037 | 0.0429 |
| Em14d_vs_AC14d | *Desulfovibrio* | AC14d | 2.7674 | -10.2295 | 0.0019 | 0.0026 | 0.0006 |
| Em14d_vs_AC14d | *Arcobacter* | Em14d | 2.6955 | 10.3068 | 0.0021 | 0.0028 | 0.0006 |
| Em14d_vs_AC14d | Christensenellaceae(UG) | Em14d | 2.6489 | 16.3318 | 0.0021 | 0.0028 | 0.0412 |
| Em14d_vs_AC14d | *Parabacteroides* | AC14d | 2.6019 | -11.0672 | 0.0021 | 0.0028 | 0.0011 |
| Em14d_vs_AC14d | *Clostridium* | AC14d | 2.5954 | -5.3976 | 0.0032 | 0.0042 | 0.0016 |
| Em14d_vs_AC14d | *Flexispira* | AC14d | 2.5355 | -8.3582 | 0.0017 | 0.0023 | 0.0002 |
| Em14d_vs_AC14d | *Dorea* | AC14d | 2.4807 | -9.7705 | 0.0019 | 0.0026 | 0.0004 |
| Em14d_vs_AC14d | Coriobacteriaceae(UG) | AC14d | 2.3313 | -9.0934 | 0.0020 | 0.0027 | 0.0003 |
| Em14d_vs_AC14d | *Roseburia* | AC14d | 2.3094 | -8.1889 | 0.0068 | 0.0089 | 0.0001 |
| Em14d_vs_AC14d | *Coriobacterium* | Em14d | 2.3094 | 8.1813 | 0.0068 | 0.0089 | 0.0001 |
| Em14d_vs_AC14d | *Persicirhabdus* | Em14d | 2.2361 | 8.7647 | 0.0069 | 0.0090 | 0.0002 |
| Em14d_vs_AC14d | *Vestibaculum* | Em14d | 2.1918 | 7.9894 | 0.0068 | 0.0089 | 0.0001 |
| Em14d_vs_AC14d | *Oscillospira* | AC14d | 2.1204 | -14.4031 | 0.0021 | 0.0028 | 0.0108 |
| Em14d_vs_AC14d | Peptococcaceae(UG) | Em14d | 2.0693 | 3.5594 | 0.0047 | 0.0061 | 0.0005 |
| Em14d_vs_AC14d | *Bifidobacterium* | AC14d | 2.0226 | -9.3560 | 0.0020 | 0.0027 | 0.0003 |
| Em21d_vs_AC21d | *Papillibacter* | Em21d | 7.8424 | 14.6663 | 0.0021 | 0.0027 | 0.0130 |
| Em21d_vs_AC21d | *Pediococcus* | Em21d | 5.9108 | 11.9047 | 0.0021 | 0.0027 | 0.0019 |
| Em21d_vs_AC21d | *Anaerofilum* | Em21d | 5.7786 | 8.6364 | 0.0028 | 0.0037 | 0.0074 |
| Em21d_vs_AC21d | *Sporobacter* | Em21d | 4.8534 | 16.9212 | 0.0021 | 0.0028 | 0.0621 |
| Em21d_vs_AC21d | *Ewingella* | Em21d | 4.5605 | 18.0680 | 0.0021 | 0.0028 | 0.1374 |
| Em21d_vs_AC21d | *Jeotgalicoccus* | AC21d | 4.4854 | -10.8851 | 0.0019 | 0.0026 | 0.0009 |
| Em21d_vs_AC21d | ML615J-28(UG) | Em21d | 3.4037 | 11.6031 | 0.0021 | 0.0028 | 0.0016 |
| Em21d_vs_AC21d | Christensenellaceae(UG) | Em21d | 3.3792 | 11.8625 | 0.0028 | 0.0037 | 0.0696 |
| Em21d_vs_AC21d | *Turicibacter* | AC21d | 3.3741 | -4.9656 | 0.0033 | 0.0043 | 0.0012 |
| Em21d_vs_AC21d | *Streptococcus* | AC21d | 3.3546 | -4.3731 | 0.0036 | 0.0047 | 0.0016 |
| Em21d_vs_AC21d | Muribaculaceae(UG) | AC21d | 3.2096 | -10.0679 | 0.0033 | 0.0043 | 0.1171 |
| Em21d_vs_AC21d | *Facklamia* | AC21d | 3.0666 | -3.7443 | 0.0036 | 0.0046 | 0.0013 |
| Em21d_vs_AC21d | Peptococcaceae(UG) | Em21d | 2.9389 | 4.4146 | 0.0019 | 0.0025 | 0.0004 |
| Em21d_vs_AC21d | *Dehalobacterium* | Em21d | 2.8092 | 4.3257 | 0.0035 | 0.0045 | 0.0012 |
| Em21d_vs_AC21d | *Clostridium* | AC21d | 2.7923 | -4.2741 | 0.0026 | 0.0034 | 0.0007 |
| Em21d_vs_AC21d | *Oscillospira* | AC21d | 2.6158 | -7.4603 | 0.0028 | 0.0037 | 0.0033 |
| Em21d_vs_AC21d | *AF12* | Em21d | 2.5759 | 5.9983 | 0.0026 | 0.0034 | 0.0012 |
| Em21d_vs_AC21d | *Anaerostipes* | Em21d | 2.5626 | 9.9917 | 0.0028 | 0.0037 | 0.0376 |
| Em21d_vs_AC21d | Aerococcaceae(UG) | AC21d | 2.5560 | -9.9927 | 0.0021 | 0.0028 | 0.0005 |
| Em21d_vs_AC21d | Barnesiellaceae(UG) | Em21d | 2.5249 | 9.7441 | 0.0038 | 0.0048 | 0.0941 |
| Em21d_vs_AC21d | *Escherichia* | AC21d | 2.3515 | -9.1727 | 0.0037 | 0.0048 | 0.1257 |
| Em21d_vs_AC21d | *Aerococcus* | AC21d | 2.3264 | -9.2737 | 0.0073 | 0.0095 | 0.0003 |
| Em21d_vs_AC21d | Mogibacteriaceae(UG) | AC21d | 2.2361 | -7.7755 | 0.0062 | 0.0081 | 0.0001 |
| Em21d_vs_AC21d | *Corynebacterium* | AC21d | 2.2178 | -8.6469 | 0.0071 | 0.0093 | 0.0002 |
| Em21d_vs_AC21d | *Ruminococcus* | AC21d | 2.1664 | -4.5611 | 0.0036 | 0.0047 | 0.0031 |
| Em21d_vs_AC21d | *Lactobacillus* | AC21d | 2.1381 | -17.9868 | 0.0021 | 0.0028 | 0.1299 |
| Em21d_vs_AC21d | *Arcobacter* | Em21d | 2.0125 | 10.9320 | 0.0021 | 0.0027 | 0.0010 |
| Em28d_vs_AC28d | *Arcobacter* | Em28d | 4.8990 | 10.7622 | 0.0040 | 0.0054 | 0.0009 |
| Em28d_vs_AC28d | *Ruminococcus* | AC28d | 4.8284 | -5.9672 | 0.0051 | 0.0067 | 0.0032 |
| Em28d_vs_AC28d | *Pediococcus* | Em28d | 4.6947 | 6.1066 | 0.0047 | 0.0062 | 0.0017 |
| Em28d_vs_AC28d | *Coriobacterium* | Em28d | 4.3818 | 9.1789 | 0.0036 | 0.0049 | 0.0003 |
| Em28d_vs_AC28d | *Facklamia* | AC28d | 4.3575 | -3.9051 | 0.0050 | 0.0066 | 0.0011 |
| Em28d_vs_AC28d | Muribaculaceae(UG) | AC28d | 4.1627 | -12.9661 | 0.0041 | 0.0055 | 0.1352 |
| Em28d_vs_AC28d | Barnesiellaceae(UG) | Em28d | 3.5720 | 9.3582 | 0.0061 | 0.0080 | 0.1411 |
| Em28d_vs_AC28d | *Prevotella* | AC28d | 3.4722 | -4.3691 | 0.0061 | 0.0080 | 0.0097 |
| Em28d_vs_AC28d | *Papillibacter* | Em28d | 3.1265 | 8.6597 | 0.0051 | 0.0067 | 0.0099 |
| Em28d_vs_AC28d | *Anaerofilum* | Em28d | 2.9832 | 13.8769 | 0.0041 | 0.0055 | 0.0082 |
| Em28d_vs_AC28d | Clostridiales(UG) | AC28d | 2.9587 | -2.4249 | 0.0061 | 0.0080 | 0.0170 |
| Em28d_vs_AC28d | *Turicibacter* | AC28d | 2.9528 | -10.7332 | 0.0027 | 0.0038 | 0.0008 |
| Em28d_vs_AC28d | *Defluviitalea* | Em28d | 2.9051 | 14.1509 | 0.0041 | 0.0055 | 0.0099 |
| Em28d_vs_AC28d | *AF12* | Em28d | 2.7737 | 4.3862 | 0.0055 | 0.0073 | 0.0010 |
| Em28d_vs_AC28d | Aerococcaceae(UG) | AC28d | 2.7386 | -10.0921 | 0.0028 | 0.0039 | 0.0005 |
| Em28d_vs_AC28d | *Treponema* | AC28d | 2.6833 | -9.4490 | 0.0027 | 0.0038 | 0.0003 |
| Em28d_vs_AC28d | *Odoribacter* | AC28d | 2.5948 | -10.6573 | 0.0109 | 0.0147 | 0.0007 |
| Em28d_vs_AC28d | *Clostridium* | AC28d | 2.5584 | -10.7697 | 0.0027 | 0.0038 | 0.0008 |
| Em28d_vs_AC28d | ML615J-28(UG) | Em28d | 2.5402 | 12.6844 | 0.0041 | 0.0055 | 0.0036 |
| Em28d_vs_AC28d | *Jeotgalicoccus* | AC28d | 2.4857 | -10.9071 | 0.0028 | 0.0039 | 0.0009 |
| Em28d_vs_AC28d | *Candidatus Arthromitus* | AC28d | 2.4648 | -8.6205 | 0.0025 | 0.0034 | 0.0002 |
| Em28d_vs_AC28d | *Lactobacillus* | AC28d | 2.4531 | -17.6836 | 0.0028 | 0.0039 | 0.0957 |
| Em28d_vs_AC28d | *Aerococcus* | AC28d | 2.4495 | -9.7705 | 0.0027 | 0.0037 | 0.0004 |
| Em28d_vs_AC28d | *Sporobacter* | Em28d | 2.3747 | 16.0258 | 0.0041 | 0.0055 | 0.0364 |
| Em28d_vs_AC28d | *Staphylococcus* | AC28d | 2.3307 | -10.1486 | 0.0028 | 0.0039 | 0.0005 |
| Em28d_vs_AC28d | *Bacteroides* | AC28d | 2.3141 | -4.3151 | 0.0062 | 0.0081 | 0.0149 |
| Em28d_vs_AC28d | F16(UG) | AC28d | 2.2996 | -10.6573 | 0.0109 | 0.0147 | 0.0007 |
| Em28d_vs_AC28d | *Desulfovibrio* | AC28d | 2.2854 | -4.3206 | 0.0041 | 0.0055 | 0.0004 |
| Em28d_vs_AC28d | *Streptococcus* | AC28d | 2.2743 | -2.5723 | 0.0166 | 0.0213 | 0.0019 |
| Em28d_vs_AC28d | *Oscillospira* | AC28d | 2.2206 | -13.2609 | 0.0028 | 0.0039 | 0.0045 |
| Em28d_vs_AC28d | *Parabacteroides* | AC28d | 2.1321 | -11.8396 | 0.0028 | 0.0039 | 0.0017 |
| Em28d_vs_AC28d | *Corynebacterium* | AC28d | 2.1213 | -7.7755 | 0.0102 | 0.0138 | 0.0001 |
| Em28d_vs_AC28d | *Escherichia* | AC28d | 2.0941 | -11.6274 | 0.0041 | 0.0055 | 0.1055 |
